# Supplementary material for: Administration of mucuna beans (Mucuna pruriences (L.) DC. var. utilis) improves cognition and neuropathology of 3 × Tg-AD mice
Source: Sci Rep. 2022 Jan 19;12:996. doi: 10.1038/s41598-022-04777-z (PMC8770455; doi:10.1038/s41598-022-04777-z)
Supplement: Supplementary file 1 — Supplementary Information 1. [file 41598_2022_4777_MOESM1_ESM.xlsx]

## Sheet: Sheet1
	Supplementary Dataset 1: Striatum AB blots
	Figure 3. Immunoblotting analysis of Aβ oligomers in the TBS-soluble fraction.
	Striatum
			Control	Mucuna
	#1-3 of Control and Mucuna were chozen for Figure 3.
