# Supplementary material for: Administration of mucuna beans (Mucuna pruriences (L.) DC. var. utilis) improves cognition and neuropathology of 3 × Tg-AD mice
Source: Sci Rep. 2022 Jan 19;12:996. doi: 10.1038/s41598-022-04777-z (PMC8770455; doi:10.1038/s41598-022-04777-z)
Supplement: Supplementary file 3 — Supplementary Information 3. [file 41598_2022_4777_MOESM3_ESM.xlsx]

## Sheet: Sheet1
	Supplementary Dataset 3: Hippocumpus AB blots
	Figure 3. Immunoblotting analysis of Aβ oligomers in the TBS-soluble fraction.
	Hippocampus
		Control		Mucuna
	#2-4 of Control and #1-3 of Mucuna were chozen for Figure 3.
